# Supplementary material for: Comparison of Droplet Digital PCR and Quantitative PCR Assays for Quantitative Detection of Xanthomonas citri Subsp. citri
Source: PubMed Central journal article supplement (PMC4948846; doi:10.1371/journal.pone.0159004), 2016-07-18
Supplement: pone.0159004.s002.pdf [file pone.0159004.s002.pdf]

**S1 Table. qPCR quantitative detection of plasmid DNA and bacterial suspension standards**

| Plasmid<br>DNA <sup>a</sup> | Cq    |       | Log SQ <sup>b</sup> | Bacterial<br>suspension <sup>c</sup> | Cq    |       | Log SQ |
|-----------------------------|-------|-------|---------------------|--------------------------------------|-------|-------|--------|
|                             | Mean  | SD    |                     |                                      | Mean  | SD    |        |
| 5.88E+6                     | 12.12 | 0.032 | 6.769               | 1.78E+8                              | 9.08  | 0.052 | 8.25   |
| 5.88E+5                     | 15.16 | 0.001 | 5.769               | 1.78E+7                              | 12.06 | 0.052 | 7.25   |
| 5.88E+4                     | 18.68 | 0.006 | 4.769               | 1.78E+6                              | 15.4  | 0.071 | 6.25   |
| 5.88E+3                     | 21.83 | 0.097 | 3.769               | 1.78E+5                              | 19.21 | 0.07  | 5.25   |
| 5.88E+2                     | 25.06 | 0.005 | 2.769               | 1.78E+4                              | 21.67 | 0.05  | 4.25   |
| 5.88E+1                     | 28.34 | 0.186 | 1.769               | 1.78E+3                              | 25.13 | 0.025 | 3.25   |
| 5.88E+0                     | 32.15 | 0.46  | 0.769               | 1.78E+2                              | 27.7  | 0.112 | 2.25   |
| NTC <sup>d</sup>            | 0     | 0     | 0                   | 1.78E+1                              | 29.83 | 0.012 | 1.25   |
|                             |       |       |                     | 1.78E+0                              | 0     | 0     | 0      |
|                             |       |       |                     | NTC                                  | 0     | 0     | 0      |

<sup>a</sup> Values reflect copies/ $\mu$ L of calculated serial dilutions of positive plasmid DNA standard.

<sup>b</sup> SQ means starting quantity. Data represent the means of each dilution tested in triplicate.

<sup>c</sup> Values reflect CFUs/ $\mu$ L of calculated serial dilutions of *Xcc* bacterial suspension standard.

<sup>d</sup> NTC means no template control
