# Supplementary material for: Comparison of Droplet Digital PCR and Quantitative PCR Assays for Quantitative Detection of Xanthomonas citri Subsp. citri
Source: PubMed Central journal article supplement (PMC4948846; doi:10.1371/journal.pone.0159004), 2016-07-18
Supplement: pone.0159004.s003.pdf [file pone.0159004.s003.pdf]

**S2 Table. ddPCR quantitative detection of plasmid DNA and bacterial suspension standards**

| Plasmid<br>DNA <sup>a</sup> | ddPCR results     |                             |              | Bacterial<br>suspension <sup>d</sup> | ddPCR results     |                |              |
|-----------------------------|-------------------|-----------------------------|--------------|--------------------------------------|-------------------|----------------|--------------|
|                             | Mean <sup>b</sup> | Poisson<br>SEM <sup>c</sup> | Total<br>SEM |                                      | Mean <sup>e</sup> | Poisson<br>SEM | Total<br>SEM |
| 5.88E+4                     | 2392              | 18.88                       | 18.88        | 1.78E+4                              | 9000              | 459.18         | 1045.92      |
| 5.88E+3                     | 247               | 3.57                        | 3.57         | 1.78E+3                              | 1545              | 9.18           | 132.65       |
| 5.88E+2                     | 28.6              | 1.10                        | 1.10         | 1.78E+2                              | 222.6             | 2.55           | 6.89         |
| 5.88E+1                     | 4.1               | 0.41                        | 0.41         | 1.78E+1                              | 23.4              | 0.81           | 1.71         |
| 5.88E+0                     | 1.07              | 0.21                        | 0.23         | 1.78E+0                              | 2.14              | 0.24           | 0.24         |
| 5.88E-1                     | 0.32              | 0.12                        | 0.12         | 1.78E-1                              | 0.25              | 0.11           | 0.11         |
| NTC <sup>f</sup>            | 0                 | 0                           | 0            | NTC                                  | 0                 | 0              | 0            |

<sup>a</sup> Values reflect copies/ $\mu$ L of calculated serial dilutions of positive plasmid DNA standard.

<sup>b</sup> Values reflect copies/ $\mu$ L ddPCR reaction. Data represent the ddPCR measurement from merged triplicate tests of each dilution.

<sup>c</sup> SEM means standard error of mean.

<sup>d</sup> Values reflect CFUs/ $\mu$ L of calculated serial dilutions of *Xcc* bacterial suspension standard.

<sup>e</sup> Values reflect CFUs/ $\mu$ L ddPCR reaction. Data represent the ddPCR measurement from merged triplicate tests of each dilution.

<sup>f</sup> NTC means no template control.
