# Supplementary material for: Comparison of Droplet Digital PCR and Quantitative PCR Assays for Quantitative Detection of Xanthomonas citri Subsp. citri
Source: PubMed Central journal article supplement (PMC4948846; doi:10.1371/journal.pone.0159004), 2016-07-18
Supplement: pone.0159004.s004.pdf [file pone.0159004.s004.pdf]

**S3 Table. Quantitative results of qPCR and ddPCR method in reproducibility comparison**

| Sample ID | qPCR <sup>a</sup> |           |           |        | ddPCR <sup>b</sup> |        |        |        | CV%                    |
|-----------|-------------------|-----------|-----------|--------|--------------------|--------|--------|--------|------------------------|
|           | Test 1            | Test 2    | Test 3    | CV%    | Test 1             | Test 2 | Test 3 | CV%    | Decreased <sup>c</sup> |
| B-1       | 181957.12         | 155960.57 | 178315.12 | 8.18%  | 80000              | 82000  | 78000  | 2.50%  | 69.44%                 |
| B-2       | 709.11            | 852.79    | 859.28    | 10.52% | 1570               | 1550   | 13200  | 9.39%  | 10.74%                 |
| P-1       | 111.54            | 120.95    | 113.14    | 4.37%  | 1250               | 1302   | 1240   | 2.54%  | 41.88%                 |
| P-2       | 12.23             | 14.92     | 13.33     | 10.03% | 183                | 190    | 198    | 3.94%  | 60.72%                 |
| P-3       | 1.29              | 3.68      | 1.69      | 57.69% | 21                 | 13     | 23     | 27.85% | 51.72%                 |
| P-4       | 0.95              | 1.40      | 1.08      | 20.25% | 6.9                | 5.8    | 5.1    | 15.29% | 24.49%                 |
| P-5       | 0.86              | 0.73      | 1.05      | 18.28% | 5.5                | 4.5    | 6.3    | 16.60% | 9.19%                  |
| P-6       | 0.43              | 0.66      | 0.90      | 34.88% | 7.5                | 7.7    | 9.3    | 12.08% | 65.37%                 |

<sup>a</sup> Values reflect copies/ $\mu$ L based on serial dilutions of positive plasmid DNA standard.

<sup>b</sup> Values reflect copies/20 $\mu$ L ddPCR reaction.

<sup>c</sup> Decreased CV% was calculated by  $100\% \times (CV\%_{ddPCR} - CV\%_{qPCR}) / CV\%_{qPCR}$ .
